# Supplementary material for: Reconstruction of a Comprehensive Interactome and Experimental Data Analysis of FRA10AC1 May Provide Insights into Its Biological Role in Health and Disease
Source: MDPI journal article supplement (doi:10.3390/genes14030568), 2023-02-24
Supplement: s1 [file s1]

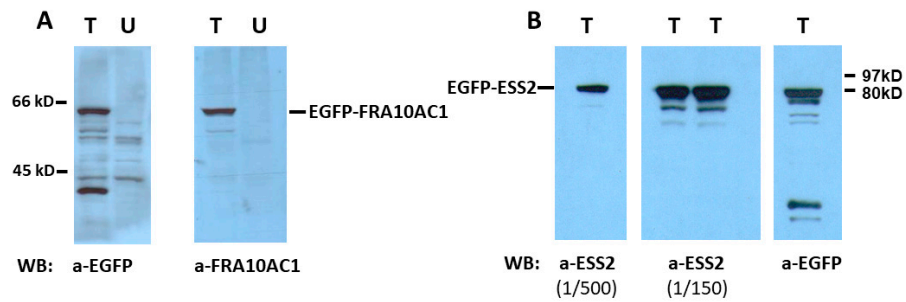

**Figure. S1.** Testing home-made anti-FRA10AC1 and anti-ESS2 antibody specificity. (A) *HeLa* cell lysates transfected with an EGFP-FRA10AC1 recombinant plasmid were subjected in western blot analysis using either anti-EGFP or affinity-purified anti-FRA10AC1 antibodies. (B) Similarly, *HeLa* cell lysates transfected with an EGFP-ESS2 recombinant plasmid were subjected in western blot analysis using either anti-EGFP or two different dilutions of affinity-purified anti-ESS2 antibody. Abbreviations: T, transfected cells ; U, untransfected cells; WB, western blot; numbers in kD indicate protein size markers.
