# Supplementary material for: Reconstruction of a Comprehensive Interactome and Experimental Data Analysis of FRA10AC1 May Provide Insights into Its Biological Role in Health and Disease
Source: Genes (Basel). 2023 Feb 24;14(3):568. doi: 10.3390/genes14030568 (PMC10048706; doi:10.3390/genes14030568)
Supplement: Supplementary file 1 [file genes-14-00568-s001.zip › genes-2164709-supplementary.xlsx]

## Sheet: Table S1
Table S1. List of direct protein interactions of FRA10AC1 with its first neighbors and any interactions between them
Interactor 1			Interactor 2			Detection method	Pubmed ID
Symbol 1	Gene ID_1	UniProt ID_1	Symbol 2	Gene ID_2	UniProt ID_2
FRA10AC1	118924	Q70Z53	PRPF40A	55660	O75400	2-hybrid	22365833
FRA10AC1	118924	Q70Z53	SF3B2	10992	Q13435	2-hybrid; anti tag co-immunoprecipitation (Co-IP rec./GST-pulldown)	22365833; data herein
FRA10AC1	118924	Q70Z53	U2AF1	7307	Q01081	2-hybrid	22365833
FRA10AC1	118924	Q70Z53	CHERP	10523	Q8IWX8	2-hybrid; anti tag co-immunoprecipitation	22365833
FRA10AC1	118924	Q70Z53	PRPF3	9129	O43395	2-hybrid	22365833; 32325033*
FRA10AC1	118924	Q70Z53	MFAP1	4236	P55081	2-hybrid	22365833
FRA10AC1	118924	Q70Z53	IK	3550	Q13123	2-hybrid; anti tag co-immunoprecipitation	22365833
FRA10AC1	118924	Q70Z53	THOC1	9984	Q96FV9	2-hybrid	22365833; 32325033*
FRA10AC1	118924	Q70Z53	CWC27	10283	Q6UX04	2-hybrid	22365833
FRA10AC1	118924	Q70Z53	ESS2	8220	Q96DF8	2-hybrid; anti tag co-immunoprecipitation (Co-IP rec./GTS-pulldown; Co-IP endo.)	22365833; 14605208; data herein; 28514442*
FRA10AC1	118924	Q70Z53	ZNF830	91603	Q96NB3	2-hybrid	22365833
FRA10AC1	118924	Q70Z53	SAP30BP	29115	Q9UHR5	2-hybrid	22365833
FRA10AC1	118924	Q70Z53	NKAP	79576	Q8N5F7	2-hybrid	22365833
FRA10AC1	118924	Q70Z53	TTC14	151613	Q96N46	2-hybrid	22365833
FRA10AC1	118924	Q70Z53	ZCCHC10	54819	Q8TBK6	2-hybrid	22365833
FRA10AC1	118924	Q70Z53	HABP4	22927	Q5JVS0	2-hybrid	16169070
FRA10AC1	118924	Q70Z53	EEF1D	1936	P29692	2-hybrid	16169070
FRA10AC1	118924	Q70Z53	ADPRHL2	54936	Q9NX46	2-hybrid	16169070
FRA10AC1	118924	Q70Z53	CCDC155	147872	Q8N6L0	2-hybrid	25416956
FRA10AC1	118924	Q70Z53	TRIM41	90933	H0Y9T3	2-hybrid	25416956
FRA10AC1	118924	Q70Z53	C7orf25	79020	Q9BPX7	2-hybrid	16169070
FRA10AC1	118924	Q70Z53	MAP3K12	26404	Q12852	2-hybrid	16169070
FRA10AC1	118924	Q70Z53	VPS29	51699	Q9UBQ0	2-hybrid	16169070
FRA10AC1	118924	Q70Z53	GDPD2	54857	Q9HCC8	2-hybrid	16169070
FRA10AC1	118924	Q70Z53	PLPPR4	9890	Q7Z2D5	2-hybrid	16169070
FRA10AC1	118924	Q70Z53	GATD3A	8209	P0DPI2	2-hybrid	16169070
FRA10AC1	118924	Q70Z53	GLRX3	10539	O76003	2-hybrid	16169070
FRA10AC1	118924	Q70Z53	MOB2	81532	Q70IA6	2-hybrid	32296183
PRPF40A	55660	O75400	SF3B2	10992	Q13435	2-hybrid; pull down	22365833; 16055720*
PRPF40A	55660	O75400	ZCCHC10	54819	Q8TBK6	2-hybrid	22365833
PRPF40A	55660	O75400	NKAP	79576	Q8N5F7	2-hybrid	22365833; 26186194*; 28514442*
PRPF40A	55660	O75400	U2AF1	7307	Q01081	2-hybrid	22365833
PRPF40A	55660	O75400	CHERP	10523	Q8IWX8	2-hybrid	22365833
SF3B2	10992	Q13435	U2AF1	7307	Q01081	2-hybrid; anti tag coimmunoprecipitation	22365833
SF3B2	10992	Q13435	PRPF3	9129	O43395	2-hybrid; anti tag coimmunoprecipitation	22365833
SF3B2	10992	Q13435	THOC1	9984	Q96FV9	2-hybrid; colocalization	22365833; 22939629*
SF3B2	10992	Q13435	TTC14	151613	Q96N46	2-hybrid	22365833
SF3B2	10992	Q13435	ZCCHC10	54819	Q8TBK6	2-hybrid	22365833
SF3B2	10992	Q13435	ZNF830	91603	Q96NB3	2-hybrid; anti tag coimmunoprecipitation	22365833
SF3B2	10992	Q13435	C7orf25	79020	Q9BPX7	2-hybrid	21900206
U2AF1	7307	Q01081	MFAP1	4236	P55081	2-hybrid	22365833
U2AF1	7307	Q01081	CHERP	10523	Q8IWX8	2-hybrid	22365833
U2AF1	7307	Q01081	ZCCHC10	54819	Q8TBK6	2-hybrid	22365833
U2AF1	7307	Q01081	NKAP	79576	Q8N5F7	2-hybrid; anti tag coimmunoprecipitation	22365833
CHERP	10523	Q8IWX8	TTC14	151613	Q96N46	2-hybrid	22365833
PRPF3	9129	O43395	MFAP1	4236	P55081	2-hybrid; anti tag coimmunoprecipitation	22365833
PRPF3	9129	O43395	ZCCHC10	54819	Q8TBK6	2-hybrid	22365833
PRPF3	9129	O43395	NKAP	79576	Q8N5F7	2-hybrid; anti tag coimmunoprecipitation	22365833
MFAP1	4236	P55081	IK	3550	Q13123	2-hybrid; anti tag coimmunoprecipitation	22365833
MFAP1	4236	P55081	TRIM41	90933	H0Y9T3	2-hybrid	25416956, 32296183
IK	3550	Q13123	THOC1	9984	Q96FV9	2-hybrid; colocalization	22365833; 22939629*
IK	3550	Q13123	ZCCHC10	54819	Q8TBK6	2-hybrid	22365833
IK	3550	Q13123	ZNF830	91603	Q96NB3	2-hybrid; anti tag coimmunoprecipitation	22365833
IK	3550	Q13123	TTC14	151613	Q96N46	2-hybrid	22365833; 32325033*
THOC1	9984	Q96FV9	SAP30BP	29115	Q9UHR5	2-hybrid	22365833
ESS2	8220	Q96DF8	TTC14	151613	Q96N46	2-hybrid	22365833
NKAP	79576	Q8N5F7	TTC14	151613	Q96N46	2-hybrid	22365833
THOC1	9984	Q96FV9	MFAP1	4236	P55081	affinity chromatography technology, colocalization	31390568
C7orf25	79020	Q9BPX7	C7orf25	79020	Q9BPX7	2-hybrid	16169070
EEF1D	1936	P29692	EEF1D	1936	P29692	2-hybrid	10094407, 16169070, 25416956
GLRX3	10539	O76003	GLRX3	10539	O76003	2-hyb, molecular sieving	10636891, 25416956, 26302480
NKAP	79576	Q8N5F7	NKAP	79576	Q8N5F7	2-hybrid	22365833
PRPF40A	55660	O75400	PRPF40A	55660	O75400	2-hybrid	22365833, 9700202
PRPF3	9129	O43395	PRPF3	9129	O43395	2-hybrid; anti tag coimmunoprecipitation	16723661, 22365833
ΙΚ	3550	Q13123	ΙΚ	3550	Q13123	2-hybrid; anti tag coimmunoprecipitation	22365833
THOC1	9984	Q96FV9	THOC1	9984	Q96FV9	2-hybrid	22365833
TRIM41	90933	H0Y9T3	TRIM41	90933	H0Y9T3	2-hybrid; enzymatic study	17893151, 22493164, 25416956, 32296183
EEF1D	1936	P29692	FMR1	2332	Q06787	two hybrid fragment pooling approach	31413325
EEF1D	1936	P29692	APP	351	P05067	pull down	21244100
EEF1D	1936	P29692	SQSTM	8878	Q13501	two hybrid; confocal microscopy	21988832
EEF1D	1936	P29692	PIK3R1	5295	P27986	display technology	20195357
TRIM41	90933	H0Y9T3	FAM161A	84140	Q3B820	2-hybrid	32296183
TRIM41	90933	H0Y9T3	FMR1	2332	Q06787	two hybrid fragment pooling approach	31413325
TRIM41	90933	H0Y9T3	APP	351	P05067	pull down	21244100, 21832049
HABP4	22927	Q5JVS0	FMR1	2332	Q06787	anti bait coimmunoprecipitation	21771594, 28695742
VPS29	51699	Q9UBQ0	PIK3R1	5295	P27986	two hybrid pooling approach	32814053
VPS29	51699	Q9UBQ0	SQSTM	8878	Q13501	two hybrid pooling approach	32814053
VPS29	51699	Q9UBQ0	APP	351	P05067	pull down	21244100, 21832049
GATD3A	8209	P0DPI2	APP	351	P05067	pull down	21832049
CCDC155	147872	Q8N6L0	FAM161A	84140	Q3B820	2-hybrid	25416956
Note: All interactors are described by their HUGO official symbol, Gene ID, and UniProt ID. Detection method(s) supporting a given direct interaction and the respective Pubmed IDs are listed. PPI data were retrieved from the PICKLE protein-protein interaction meta-database, release 3.3 (www.pickle.gr). Upper part: FRA10AC1 first neighbors and any interactions between them. Co-IP rec.: co-immunopr…
* publications reporting PPIs in the context of human or mouse protein complexes

## Sheet: Table S2
Table S2: First neighbors of FRA10AC1 and their characteristics
Protein	Function	Complex	Subcellular localization	RNA binding	Involvement in disease	References (Pubmed IDs & databases)
PRPF40A	putative orthologue of yeast splicing factor Prp40	spliceosome	nucleus, speckles	√	associated with memory dysfunction in frontotemporal lobe dementia	26494226, 28884683, 29724592; hRBPome
SF3B2	splicing	spliceosome	nucleus	√	its haploinsufficiency causes craniofacial microsomia	10490618, 22658674, 22681889, 31900758, 30595370, 34344887; hRBPome
U2AF1	splicing	spliceosome	nucleus	√		16043505, 25901584, 22658674; hRBPome
CHERP	splicing	spliceosome	nucleus	√		24078636, 22658674, 30332651; hRBPome
PRPF3	splicing	spliceosome	nucleus	√	mutations cause retinitis pigmentosa	12374753, 17517693, 18553058, 22681889; hRBPome
MFAP1	splicing	spliceosome	nucleus, nuclear matrix	√		18765666, 25090448; hRBPome
IK	splicing (C. elegans orthologue)	spliceosome	nucleus			15254247, 24252166
THOC1	mRNA export	spliceosome	nucleus	√	heterozygous variant cause late-onset, progressive, non-syndromic hearing loss	15358532, 15998806, 32776944; hRBPome
CWC27	recruitment of exon Junction complex	spliceosome	nucleus	√	homozygous mutations cause retinitis pigmentosa & neurological defects	32329775, 31481716; hRBPome, Human Protein Atlas
ESS2	splicing, transcription	spliceosome	nucleus	√	associated with schizophrenia	16432632, 29454968, 25194163, 25628531; hRBPome
ZNF830	homologous recombination repair regulator	spliceosome	nucleus			29244158
SAP30BP	transcription	spliceosome	nucleus	√		27453046; Human Protein Atlas
NKAP	transcription, chromosome alignment	spliceosome	nucleus	√	mutations cause developmental delay, hypotonia, behavioral abnormalities, Marfanoid habitus and scoliosis	14550261, 24353314, 31587868; hRBPome
ZCCHC10	transcription	spliceosome	nucleus			31404068; Human Protein Atlas
HABP4	splicing		nucleus, cytoplasm	√	associated with cognitive ability	19523114, 31768228; hRBPome
MOB2	DNA damage response, cell cycle regulation	exon junction complex	nucleoplasm, nucleoli, cytosol		biallelic mutations cause neuronal mispositioning and periventricular nodular heterotopia	25460043, 23084401, 29593499; Human Protein Atlas
TTC14	unknown	spliceosome	nucleus	√		hRBPome, Human Protein Atlas
EEF1D	transcription; translation regulator activity (long and short isoforms respectively)	elongation factor-1 complex	nucleus		mutation in the exon specific to the long isoform was reported in a patient with a neurodevelopmental disorder	21597468, 28097321
ADPRHL2	DNA and protein ADP-ribosylhydrolase activity, recruited to DNA lesion regions following DNA damage and repair		nucleus		mutations cause epileptic ataxia syndrome	30100084, 34019811; Human Protein Atlas
CCDC155	meiosis (required for telomere attachment to nuclear envelope in the meiotic prophase)s	LINC (LInker of Nucleoskeleton and Cytoskeleton) complex	nucleus		mutations cause idiopathic nonobstructive azoospermia	24062341, 29790874
TRIM41	E3 ubiquitin ligase targeting Protein kinase C, essential roles in innate antiviral response	proteasome	nucleus			17893151
MAP3K12	Part of a non-canonical MAPK signaling pathway, enhances the AP-1-mediated transcription of APP		actin filaments, cytoplasm, nucleus			28111074
VPS29	sorting cargoes from endosomes to the trans-Golgi network or to the plasma membrane	retromer & retriever complex; cargo-selective complex	endosomes		associated with schizophrenia and neurodegenerative diseases	26220253, 28892079, 29755290, 32398722
GDPD2	glycerophosphodiester phosphodiesterase, GPI-specific phospholipase C, negative regulator of the urokinase receptor signaling network		plasma membrane			19596859, 28849762
PLPPR4	lipid phosphate phosphatase, modulates excitation at the synaptic junction	postsynaptic density membrane	plasma membrane		Its haploinsufficiency has been detected in a girl with Intellectual disability. Knockout mice exhibit epileptic seizures and behavior resembling phenotypes of psychiatric disorders	19766573, 28843862, 32388443
GATD3A (GATD3)	Glutamine amidotransferase-like class 1 domain-containing protein 3; mitochondrial nucleotide and amino acid deglycase	interacting with the mitochondrial protein translation machinery	mitochondria	√	associated with Crohn's disease; a Parkinson-associated DJ-1/PARK7-like protein	15707356, 18587394, 26926452
GLRX3	glutaredoxin- [2Fe-2S] chaperone, iron homeostasis	accembly factor of cytosolic iron-sulfur (Fe-S) cluster	cytosol, nucleus	√		23615448, 28615454, 22658674, 31527584, 30595380; hRBPome
C7orf25	unknown		nucleus			Human Protein Atlas
